# Supplementary material for: Towards Integrated Pest and Pollinator Management in Intensive Pear Cultivation: A Case Study from Belgium
Source: MDPI journal article supplement (doi:10.3390/insects12100901), 2021-10-02
Supplement: s1 [file s1]

## Supplementary Materials

Table S1. Products used and timing of interventions in the study pear orchard over the different years: (A) 2016 –(B) 2017 –(C) 2018.

Table S2. Composition of the mixed hedgerow at the border of the study pear orchard.

Table S3. Overview of insects observed visiting pear flowers during pear flowering in 2016 (A), and overview of the flower-visiting insects monitored during the transect walks after flowering in 2016–2018 (B).

Table S4. Overview of the plants visited for each functional group over the different years: (A) 2016 –(B) 2017 – (C) 2018.

Table S5. Results of linear regression models assessing the effect of pollination treatment (bagged vs open flowers) and year on pear fruit quality without outliers ( $n = 17$ ). Model statistics degrees of freedom (df),  $F$ -values and  $p$ -values are given.

Table S6. Medium price per size class for 'Conference' pears for the 2015-2016 season for quality class A3 (Belgische Fruitveiling BFV, 2016, personal communication).

Table S7. Results of linear regression models assessing the effect of the distance to *Osmia* nesting boxes and year on pear fruit quality without outliers ( $n = 16$ ). Model statistics degrees of freedom (df),  $F$ -values and  $p$ -values are given.

Table S8. Overview of species/families (or a higher taxonomic level\*) that were identified in the limb beating samples in the pear trees and in the mixed hedgerow, and their considered role (pest, beneficial or indifferent).

**Table S1.** Products used and timing of interventions in the study pear orchard over the different years: (A) 2016 –(B) 2017 –(C) 2018.

(A)

| Year | Purpose                           | Formulated Product<br>(Active Ingredient)                                   | Dose Rate<br>(kg or l/ha LWA*)<br>(l/ha for Herbicides) | Date        |
|------|-----------------------------------|-----------------------------------------------------------------------------|---------------------------------------------------------|-------------|
| 2016 | Insect control                    | Sunspray 7E (paraffinic oil)                                                | 6.0                                                     | 22/03/2016  |
|      |                                   | Decis 2.5 EC (deltamethrin)                                                 | 0.4                                                     | 13/03/2016  |
|      |                                   | Calypso 480 SC (thiacloprid)                                                | 0.25                                                    | 13/03/2016  |
|      |                                   | Vertimec 18 EC (left side) (abamectin)                                      | 0.33                                                    | 9/05/2016   |
|      |                                   | Vertimec 18 EC (right side) (abamectin)                                     | 0.33                                                    | 26/05/2016  |
|      |                                   | Movento 100 SC (left side) (spirotetramat)                                  | 1.5                                                     | 27/05/2016  |
|      | Fungal/bacterial diseases control | Mastana 500 SC (mancozeb)                                                   | 2.66                                                    | 13/04/2016  |
|      |                                   | Chorus 50 WG (cyprodinil)                                                   | 0.3                                                     | 28/04/2016  |
|      |                                   | Captan 80 WG (captan)                                                       | 1.2                                                     | 28/04/2016  |
|      |                                   | Captan 80 WG (captan)                                                       | 1.2                                                     | 2/05/2016   |
|      |                                   | Pomarsol 80 WG (thiram)                                                     | 1.46                                                    | 9/05/2016   |
|      |                                   | Captan 80 WG (captan)                                                       | 1.2                                                     | 26/05/2016  |
|      |                                   | Delan 70 WG (dithianon)                                                     | 0.5                                                     | 2/06/2016   |
|      |                                   | Geyser 250 EC (difenconazol)                                                | 0.1                                                     | 2/06/2016   |
|      |                                   | Captan 80 WG (captan)                                                       | 1.2                                                     | 7-9/06/2016 |
|      |                                   | Delan 70 WG (dithianon)                                                     | 0.5                                                     | 14/06/2016  |
|      |                                   | Pomarsol 80 WG (thiram)                                                     | 1.46                                                    | 2/08/2016   |
|      |                                   | Bellis 38 WG (boscalid + pyroclostrobin)                                    | 0.5                                                     | 10/08/2016  |
|      |                                   | Bellis 38 WG (boscalid + pyroclostrobin)                                    | 0.5                                                     | 19/08/2016  |
|      |                                   | Geoxe 50 WG (fludioxonil)                                                   | 0.33                                                    | 5/09/2016   |
|      | Weed control                      | Lentipur 500 SC (chloortuloron)                                             | 1.0                                                     | 20/06/2016  |
|      |                                   | Stomp Aqua 455 CS (pendimethalin)                                           | 1.0                                                     | 20/06/2016  |
|      |                                   | Limurex 50 SC (linuron)                                                     | 1.0                                                     | 20/06/2016  |
|      | Growth regulation                 | Promalin 1.9 SL (gibberellic acid 4 and 7 (GA4+7) + 6-benzyladenine (6-BA)) | 0.33                                                    | 24/04/2016  |
|      |                                   | Promalin 1.9 SL (gibberellic acid 4 and 7 (GA4+7) + 6-benzyladenine (6-BA)) | 0.2                                                     | 28/04/2016  |
|      |                                   | Globaryll 100 SL (6-benzyladenine)                                          | 1.33                                                    | 16/05/2016  |
|      |                                   | Fixor 100 SL ( $\alpha$ -naphthyl acetic acid)                              | 0.66                                                    | 31/08/2016  |

\* **Leaf Wall Area (LWA).** Since pear trees are a vertical crop, the product dose rate and water volume are expressed per ha LWA, as recommended by EPPO (guideline PP1/239(3) - Dose expression for plant protection products. 2020). The LWA is calculated by the number of trees x planting distance within the row (d) x treated tree height x 2 sides, and corresponded to 15,500 m<sup>2</sup>/ha soil surface in the trial orchard.

(B)

| Year | Purpose                           | Formulated Product<br>(Active Ingredient)                                                                                                                                                  | Dose Rate<br>(kg or l/ha LWA*)<br>(l/ha for Herbicides) | Date       |
|------|-----------------------------------|--------------------------------------------------------------------------------------------------------------------------------------------------------------------------------------------|---------------------------------------------------------|------------|
| 2017 | Insect control                    | Sunspray 7E (paraffinic oil)                                                                                                                                                               | 6.0                                                     | 10/03/2017 |
|      |                                   | Sunspray 7E (paraffinic oil)                                                                                                                                                               | 6.0                                                     | 24/03/2017 |
|      |                                   | Decis 2.5 EC (deltamethrin)                                                                                                                                                                | 0.4                                                     | 2/04/2017  |
|      |                                   | Calypso 480 SC (thiacloprid)                                                                                                                                                               | 0.25                                                    | 2/04/2017  |
|      |                                   | Isomate CLR ((E,E)-8,10-Dodecadien-1-ol, 1-Dodecanol, 1-Tetradecanol, (Z)-11-Tetradecen-1-yl acetate, (Z)-9-Tetradecen-1-yl acetate, (Z)-8-Tetradecen-1-yl acetate, (Z)-8-Tetradecen-1-ol) | 800 dispensers/ha                                       | 1/05/2017  |
|      |                                   | Movento 100 SC (spirotetramat)                                                                                                                                                             | 1.5                                                     | 16/05/2017 |
|      |                                   | Movento 100 SC (spirotetramat)                                                                                                                                                             | 1.5                                                     | 20/05/2017 |
|      |                                   | Decis 2.5 EC (deltamethrin)                                                                                                                                                                | 0.4                                                     | 26/09/2017 |
|      |                                   | Calypso 480 SC (thiacloprid)                                                                                                                                                               | 0.25                                                    | 26/09/2017 |
|      | Fungal/bacterial diseases control | Syllit 400 SC (dodine)                                                                                                                                                                     | 0.8                                                     | 24/03/2017 |
|      |                                   | Switch 62.5 WG (cyprodinil + fludioxonil)                                                                                                                                                  | 0.5                                                     | 4/04/2017  |
|      |                                   | Delan 70 WG (dithianon)                                                                                                                                                                    | 0.33                                                    | 20/04/2017 |
|      |                                   | Delan 70 WG (dithianon)                                                                                                                                                                    | 0.33                                                    | 16/05/2017 |
|      |                                   | Captan 80 WG (captan)                                                                                                                                                                      | 1.2                                                     | 26/05/2017 |
|      |                                   | Geyser 250 EC (difenconazol)                                                                                                                                                               | 0.1                                                     | 6/06/2017  |
|      |                                   | Delan 70 WG (dithianon)                                                                                                                                                                    | 0.30                                                    | 15/07/2017 |
|      |                                   | Captan 80 WG (captan)                                                                                                                                                                      | 1.2                                                     | 29/07/2017 |
|      |                                   | Captan 80 WG (captan)                                                                                                                                                                      | 1.2                                                     | 14/08/2017 |
|      |                                   | Bellis 38 WG (boscalid + pyroclostrobin)                                                                                                                                                   | 0.5                                                     | 28/08/2017 |
|      |                                   | Bellis 38 WG (boscalid + pyroclostrobin)                                                                                                                                                   | 0.5                                                     | 8/09/2017  |
|      |                                   | Switch 62.5 WG (cyprodinil + fludioxonil)                                                                                                                                                  | 0.5                                                     | 13/09/2017 |
|      | Weed control                      | Lentipur 500 SC (chloortuloron)                                                                                                                                                            | 1.0                                                     | 6/05/2017  |
|      |                                   | Stomp Aqua 455 CS (pendimethalin)                                                                                                                                                          | 1.0                                                     | 6/05/2017  |
|      |                                   | Limurex 50 SC (linuron)                                                                                                                                                                    | 1.0                                                     | 6/05/2017  |

\* **Leaf Wall Area (LWA).** Since pear trees are a vertical crop, the product dose rate and water volume are expressed per ha LWA, as recommended by EPPO (guideline PP1/239(3) - Dose expression for plant protection products. 2020). The LWA is calculated by the number of trees x planting distance within the row (d) x treated tree height x 2 sides, and corresponded to 15,500 m<sup>2</sup>/ha soil surface in the trial orchard.

(C)

| Year | Purpose                           | Formulated Product<br>(Active Ingredient)                                                                                                                                                  | Dose Rate<br>(kg or l/ha LWA*)<br>(l/ha for Herbicides) | Date       |
|------|-----------------------------------|--------------------------------------------------------------------------------------------------------------------------------------------------------------------------------------------|---------------------------------------------------------|------------|
| 2018 | Insect control                    | Sunspray 7E (paraffinic oil)                                                                                                                                                               | 6.0                                                     | 28/03/2018 |
|      |                                   | Decis 2.5 EC (deltamethrin)                                                                                                                                                                | 0.4                                                     | 10/04/2018 |
|      |                                   | Calypso 480 SC (thiacloprid)                                                                                                                                                               | 0.25                                                    | 10/04/2018 |
|      |                                   | Isomate CLR ((E,E)-8,10-Dodecadien-1-ol, 1-Dodecanol, 1-Tetradecanol, (Z)-11-Tetradecen-1-yl acetate, (Z)-9-Tetradecen-1-yl acetate, (Z)-8-Tetradecen-1-yl acetate, (Z)-8-Tetradecen-1-ol) | 800 dispensers/ha                                       | 28/04/2018 |
|      |                                   | Movento 100 SC (spirotetramat)                                                                                                                                                             | 1.5                                                     | 25/05/2018 |
|      |                                   | Vertimec 18 EC (abamectin)                                                                                                                                                                 | 0.33                                                    | 23/06/2018 |
|      | Fungal/bacterial diseases control | Syllit 400 SC (dodine)                                                                                                                                                                     | 0.8                                                     | 4/04/2018  |
|      |                                   | Captan 80 WG (captan)                                                                                                                                                                      | 1.2                                                     | 23/04/2018 |
|      |                                   | Captan 80 WG (captan)                                                                                                                                                                      | 1.2                                                     | 11/05/2018 |
|      |                                   | Geyser 250 EC (difenconazol)                                                                                                                                                               | 0.1                                                     | 18/05/2018 |
|      |                                   | Chorus 50 WG (cyprodinil)                                                                                                                                                                  | 0.3                                                     | 26/05/2018 |
|      |                                   | Pomarsol 80 WG (thiram)                                                                                                                                                                    | 1.66                                                    | 5/08/2018  |
|      |                                   | Switch 62.5 WG (cyprodinil + fludioxonil)                                                                                                                                                  | 0.5                                                     | 20/08/2018 |
|      |                                   | Geoxe 50 WG (fludioxonil)                                                                                                                                                                  | 0.266                                                   | 28/08/2018 |
|      | Weed control                      | Kyleo 240 SL (glyphosate)                                                                                                                                                                  | 2.5                                                     | 4/04/2018  |
|      | Growth regulation                 | Globaryll 100 SL (6-benzyladenine)                                                                                                                                                         | 1.33                                                    | 11/05/2018 |
|      |                                   | Fixor 100 SL ( $\alpha$ -naphthyl acetic acid)                                                                                                                                             | 0.66                                                    | 18/08/2018 |
|      |                                   | Fixor 100 SL ( $\alpha$ -naphthyl acetic acid)                                                                                                                                             | 0.66                                                    | 26/08/2018 |

\* **Leaf Wall Area (LWA).** Since pear trees are a vertical crop, the product dose rate and water volume are expressed per ha LWA, as recommended by EPPO (guideline PP1/239(3) - Dose expression for plant protection products. 2020). The LWA is calculated by the number of trees x planting distance within the row (d) x treated tree height x 2 sides, and corresponded to 15,500 m<sup>2</sup>/ha soil surface in the trial orchard.

**Table S2.** Composition of the mixed hedgerow at the border of the study pear orchard.

| Woody Plant Species                        | Number of Woody Plants |
|--------------------------------------------|------------------------|
| <i>Viburnum lantana</i> (wayfarer)         | 17                     |
| <i>Salix caprea</i> (goat willow)          | 15                     |
| <i>Viburnum opulus</i> (guelder rose)      | 26                     |
| <i>Ligustrum vulgare</i> (common privet)   | 24                     |
| <i>Corylus avellana</i> (common hazel)     | 22                     |
| <i>Frangula alnus</i> (breaking buckthorn) | 13                     |
| <i>Cornus sanguinea</i> (bloody dogwood)   | 7                      |
| <i>Fraxinus excelsior</i> (common ash)     | 2                      |
| <i>Cornus mas</i> (European cornel)        | 15                     |
| <i>Sambucus nigra</i> (European elder)     | 4                      |
| <i>Alnus glutinosa</i> (common alder)      | 7                      |
| <i>Fagus sylvatica</i> (common beech)      | 3                      |
| <i>Acer campestre</i> (field maple)        | 14                     |
| <i>Cytisus scoparius</i> (common broom)    | 5                      |
| <i>Carpinus betulus</i> (common hornbeam)  | 1                      |

**Table S3.** Overview of insects observed visiting pear flowers during pear flowering in 2016 (A), and overview of the flower-visiting insects monitored during the transect walks after flowering in 2016–2018 (B).

(A)

| Pollinator            | Percent %<br>(of Total Number of Flower-Visiting Insects Observed) |
|-----------------------|--------------------------------------------------------------------|
| <i>Apis mellifera</i> | 39.8                                                               |
| <i>Bombus</i> spp.    | 2.7                                                                |
| <i>Osmia cornuta</i>  | 37.3                                                               |
| other solitary bees   | 20.2                                                               |

(B)

| Insect Observed               | Number Observed |
|-------------------------------|-----------------|
| <i>Andrena bimaculata</i>     | 2               |
| <i>Andrena carantonica</i>    | 2               |
| <i>Andrena cineraria</i>      | 1               |
| <i>Andrena fulva</i>          | 1               |
| <i>Andrena fuscipes</i>       | 2               |
| <i>Andrena haemorrhoa</i>     | 7               |
| <i>Andrena vaga</i>           | 1               |
| <i>Anthophora plumipes</i>    | 7               |
| <i>Apis mellifera</i>         | 84              |
| <i>Bombus hypnorum</i>        | 5               |
| <i>Bombus lapidarius</i>      | 26              |
| <i>Bombus pascuorum</i>       | 39              |
| <i>Bombus pratorum</i>        | 20              |
| <i>Bombus terrestris</i>      | 108             |
| <i>Chalcosyrphus eunotus</i>  | 1               |
| <i>Chrysis</i> spp.           | 1               |
| <i>Criorhina ranunculi</i>    | 1               |
| <i>Doros profuges</i>         | 1               |
| <i>Epistrophe melanostoma</i> | 2               |
| <i>Episyrphus balteatus</i>   | 27              |

---

|                                |     |
|--------------------------------|-----|
| <i>Eristalis arbustorum</i>    | 52  |
| <i>Eristalis nemorum</i>       | 1   |
| <i>Eristalis pertinax</i>      | 12  |
| <i>Eristalis tenax</i>         | 10  |
| <i>Eupeodes latifasciatus</i>  | 1   |
| <i>Eupeodes luniger</i>        | 3   |
| <i>Ferdinandea cuprea</i>      | 1   |
| <i>Halictus rubicundus</i>     | 2   |
| <i>Helophilus pendulus</i>     | 1   |
| <i>Helophilus</i> spp.         | 6   |
| <i>Lasioglossum malacharum</i> | 1   |
| <i>Lasioglossum</i> spp.       | 1   |
| <i>Lucilia sericata</i>        | 1   |
| <i>Maculinea</i> spp.          | 1   |
| <i>Megachile centuncularis</i> | 2   |
| <i>Megasyrphus erraticus</i>   | 2   |
| <i>Mesembrina meridiana</i>    | 1   |
| <i>Myathropa florea</i>        | 3   |
| <i>Nomada flava</i>            | 3   |
| <i>Osmia cornuta</i>           | 19  |
| <i>Pieris rapae</i>            | 3   |
| <i>Scaeva pyrastris</i>        | 1   |
| <i>Scaeva selenitica</i>       | 1   |
| <i>Sphaerophoria batava</i>    | 6   |
| <i>Sphaerophoria scripta</i>   | 4   |
| <i>Syrphus ribesii</i>         | 8   |
| <i>Tachina fera</i>            | 3   |
| <i>Vanessa atalanta</i>        | 1   |
| <i>Vanessa cardui</i>          | 1   |
| <i>Vespa crabro</i>            | 1   |
| <i>Vespula vulgaris</i>        | 242 |
| <i>Volucella zonaria</i>       | 1   |

---

**Table S4.** Overview of the plants visited for each functional group over the different years (after pear flowering): (A) 2016 –(B) 2017 –(C) 2018.**A:**

| <i>Apis mellifera</i>             | Visit (%) | <i>Bombus</i> spp.                | Visit (%) | Solitary Bees                 | Visit (%) | Syrphid Flies                     | Visit (%) |
|-----------------------------------|-----------|-----------------------------------|-----------|-------------------------------|-----------|-----------------------------------|-----------|
| <i>Chamaenerion angustifolium</i> | 3         | <i>Chamaenerion angustifolium</i> | 5         | <i>Cornus sanguinea</i>       | 50        | <i>Achillea millefolium</i>       | 20        |
| <i>Cornus sanguinea</i>           | 46        | <i>Cornus sanguinea</i>           | 11        | <i>Phacelia tanacetifolia</i> | 50        | <i>Anthriscus sylvestris</i>      | 33        |
| <i>Geranium pyrenaicum</i>        | 11        | <i>Cotoneaster</i> spp.           | 1         |                               |           | <i>Bellis perennis</i>            | 2         |
| <i>Heracleum sphondylium</i>      | 6         | <i>Cytisus scoparius</i>          | 6         |                               |           | <i>Cirsium arvense</i>            | 15        |
| <i>Phacelia tanacetifolia</i>     | 29        | <i>Geranium pyrenaicum</i>        | 6         |                               |           | <i>Daucus carota</i>              | 2         |
| <i>Ranunculus repens</i>          | 3         | <i>Lamium album</i>               | 17        |                               |           | <i>Heracleum sphondylium</i>      | 7         |
| <i>Symphytum officinale</i>       | 3         | <i>Malva sylvestris</i>           | 5         |                               |           | <i>Lotus corniculatus</i>         | 2         |
|                                   |           | <i>Papaver somniferum</i>         | 2         |                               |           | <i>Scorzoneroideis autumnalis</i> | 4         |
|                                   |           | <i>Phacelia tanacetifolia</i>     | 18        |                               |           | <i>Solidago</i> spp.              | 13        |
|                                   |           | <i>Prunus padus</i>               | 1         |                               |           | <i>Sonchus</i> spp.               | 2         |
|                                   |           | <i>Prunus serotina</i>            | 2         |                               |           | <i>Symphytum officinale</i>       | 2         |
|                                   |           | <i>Ranunculus repens</i>          | 1         |                               |           |                                   |           |
|                                   |           | <i>Symphytum officinale</i>       | 4         |                               |           |                                   |           |
|                                   |           | <i>Taraxacum</i> agg.             | 1         |                               |           |                                   |           |
|                                   |           | <i>Trifolium pratense</i>         | 1         |                               |           |                                   |           |
|                                   |           | <i>Trifolium repens</i>           | 14        |                               |           |                                   |           |
|                                   |           | <i>Viburnum opulus</i>            | 1         |                               |           |                                   |           |
|                                   |           | <i>Vicia cracca</i>               | 2         |                               |           |                                   |           |

**B:**

| <i>Apis mellifera</i>         | Visit (%) | <i>Bombus</i> spp.                | Visit (%) | Solitary Bees                     | Visit (%) | Syrphid Flies                 | Visit (%) |
|-------------------------------|-----------|-----------------------------------|-----------|-----------------------------------|-----------|-------------------------------|-----------|
| <i>Cirsium arvense</i>        | 17        | <i>Bellis perennis</i>            | 1         | <i>Bryonia dioica</i>             | 17        | <i>Bellis perennis</i>        | 11        |
| <i>Phacelia tanacetifolia</i> | 17        | <i>Centaurea jacea</i>            | 7         | <i>Centaurea jacea</i>            | 17        | <i>Centaurea jacea</i>        | 3         |
| <i>Rhamnus frangula</i>       | 33        | <i>Chamaenerion angustifolium</i> | 7         | <i>Chamaenerion angustifolium</i> | 17        | <i>Cirsium arvense</i>        | 16        |
| <i>Silene latifolia</i>       | 17        | <i>Cirsium arvense</i>            | 4         | <i>Prunus padus</i>               | 17        | <i>Daucus carota</i>          | 3         |
| <i>Taraxacum</i> agg.         | 17        | <i>Cytisus scoparius</i>          | 7         | <i>Taraxacum</i> agg.             | 33        | <i>Heracleum sphondylium</i>  | 13        |
|                               |           | <i>Geranium pyrenaicum</i>        | 4         |                                   |           | <i>Hypericum perforatum</i>   | 11        |
|                               |           | <i>Hypericum perforatum</i>       | 1         |                                   |           | <i>Phacelia tanacetifolia</i> | 5         |
|                               |           | <i>Lamium album</i>               | 6         |                                   |           | <i>Taraxacum</i> agg.         | 39        |
|                               |           | <i>Linaria vulgaris</i>           | 1         |                                   |           |                               |           |
|                               |           | <i>Lotus corniculatus</i>         | 5         |                                   |           |                               |           |
|                               |           | <i>Malva sylvestris</i>           | 16        |                                   |           |                               |           |
|                               |           | <i>Phacelia tanacetifolia</i>     | 16        |                                   |           |                               |           |
|                               |           | <i>Prunus padus</i>               | 1         |                                   |           |                               |           |
|                               |           | <i>Ranunculus repens</i>          | 1         |                                   |           |                               |           |
|                               |           | <i>Rhamnus frangula</i>           | 6         |                                   |           |                               |           |
|                               |           | <i>Silene latifolia</i>           | 1         |                                   |           |                               |           |
|                               |           | <i>Taraxacum</i> agg.             | 5         |                                   |           |                               |           |
|                               |           | <i>Trifolium pratense</i>         | 5         |                                   |           |                               |           |
|                               |           | <i>Trifolium repens</i>           | 5         |                                   |           |                               |           |
|                               |           | <i>Viburnum opulus</i>            | 1         |                                   |           |                               |           |



C:

| <i>Apis mellifera</i>        | Visit (%) | <i>Bombus</i> spp.          | Visit (%) | Solitary Bees           | Visit (%) | Syrphid Flies                | Visit (%) |
|------------------------------|-----------|-----------------------------|-----------|-------------------------|-----------|------------------------------|-----------|
| <i>Cornus sanguinea</i>      | 17        | <i>Convolvulus sepium</i>   | 12        | <i>Cornus sanguinea</i> | 33        | <i>Bellis perennis</i>       | 2         |
| <i>Galium aparine</i>        | 17        | <i>Cornus sanguinea</i>     | 12        | <i>Rubus</i> spp.       | 33        | <i>Convolvulus arvensis</i>  | 2         |
| <i>Heracleum sphondylium</i> | 50        | <i>Cytisus scoparius</i>    | 29        | <i>Taraxacum</i> agg.   | 33        | <i>Convolvulus sepium</i>    | 5         |
| <i>Hypochoeris radicata</i>  | 17        | <i>Epilobium hirsutum</i>   | 29        |                         |           | <i>Cornus sanguinea</i>      | 10        |
|                              |           | <i>Hypericum perforatum</i> | 6         |                         |           | <i>Heracleum sphondylium</i> | 29        |
|                              |           | <i>Hypochoeris radicata</i> | 6         |                         |           | <i>Hypericum perforatum</i>  | 2         |
|                              |           | <i>Taraxacum</i> agg.       | 6         |                         |           | <i>Lolium perenne</i>        | 2         |
|                              |           |                             |           |                         |           | <i>Pyrus communis</i>        | 24        |
|                              |           |                             |           |                         |           | <i>Rubus</i> spp.            | 5         |
|                              |           |                             |           |                         |           | <i>Taraxacum</i> agg.        | 7         |
|                              |           |                             |           |                         |           | <i>Urtica dioica</i>         | 10        |

**Table S5.** Results of linear regression models assessing the effect of pollination treatment (bagged vs open flowers) and year on pear fruit quality without outliers ( $n = 17$ ). Model statistics degrees of freedom (df),  $F$ -values and  $p$ -values are given.

| Factor                     | df | $F$   | $p$     |
|----------------------------|----|-------|---------|
| Pollination treatment      | 1  | 100.2 | < 0.001 |
| Year                       | 2  | 187.7 | < 0.001 |
| Pollination treatment:Year | 2  | 8.1   | < 0.001 |

**Table S6.** Medium price per size class for 'Conference' pears for the 2015-2016 season for quality class A3 (Belgische Fruitveiling BFV, 2016, personal communication).

| Size Class | Price (€/kg) |
|------------|--------------|
| 45-50 mm   | 0.220        |
| 50-65 mm   | 0.329        |
| 55-65 mm   | 0.423        |
| 60-65 mm   | 0.470        |
| 65-70 mm   | 0.551        |
| 70-75 mm   | 0.611        |
| 75-80 mm   | 0.623        |

**Table S7.** Results of linear regression models assessing the effect of the distance to *Osmia* nesting boxes and year on pear fruit quality without outliers (n = 16). Model statistics degrees of freedom (df), *F*-values and *p*-values are given.

| Factor        | df | <i>F</i> | <i>p</i> |
|---------------|----|----------|----------|
| Distance      | 1  | 30.9     | < 0.001  |
| Year          | 2  | 98.7     | < 0.001  |
| Distance:Year | 2  | 2.6      | 0.018    |

**Table S8.** Overview of species/families (or a higher taxonomic level\*) that were identified in the limb beating samples in the pear trees and in the mixed hedgerow, and their considered role (pest, beneficial or indifferent).

| Species/Family or Higher Taxonomic Level | Order       | Role        |
|------------------------------------------|-------------|-------------|
| Acarina                                  | Acarina     | indifferent |
| <i>Anaspis</i> sp.                       | Coleoptera  | indifferent |
| <i>Anthocoris nemoralis</i>              | Hemiptera   | beneficial  |
| <i>Anthocoris nemorum</i>                | Hemiptera   | beneficial  |
| Aphidoidea                               | Hemiptera   | pest        |
| <i>Aphis fabae</i>                       | Hemiptera   | pest        |
| <i>Aphis frangulae</i>                   | Hemiptera   | indifferent |
| <i>Aphis lantanae</i>                    | Hemiptera   | indifferent |
| Araneomorphae                            | Araneae     | beneficial  |
| <i>Araneus diadematus</i>                | Araneae     | beneficial  |
| <i>Araneus</i> sp.                       | Araneae     | beneficial  |
| <i>Aulacorthum solani</i>                | Hemiptera   | indifferent |
| <i>Barypeithes araneiformis</i>          | Coleoptera  | pest        |
| Bdellidae                                | Acarina     | beneficial  |
| <i>Bembibion</i> sp.                     | Coleoptera  | beneficial  |
| <i>Blepharidopterus angulatus</i>        | Hemiptera   | beneficial  |
| <i>Bruchidius</i> sp.                    | Coleoptera  | pest        |
| <i>Cacopsylla pyri</i>                   | Hemiptera   | pest        |
| <i>Calvia quatuordecimguttata</i>        | Coleoptera  | beneficial  |
| <i>Campylomma verbascii</i>              | Hemiptera   | pest        |
| <i>Campyloneura virgula</i>              | Hemiptera   | beneficial  |
| <i>Cantharis</i> sp.                     | Coleoptera  | beneficial  |
| <i>Cardiastethus fasciventris</i>        | Hemiptera   | beneficial  |
| Cecidomyiidae                            | Diptera     | pest        |
| Chalcidoidea                             | Hymenoptera | beneficial  |
| Chalcidoidea (hyperparasitoid)           | Hymenoptera | pest        |
| <i>Chironomus plumosus</i>               | Diptera     | indifferent |
| <i>Chloropidae</i> sp.                   | Diptera     | indifferent |
| <i>Chrysoperia carnea</i>                | Neuroptera  | beneficial  |
| Cicadellidae                             | Hemiptera   | pest        |
| Coccinellidae                            | Coleoptera  | beneficial  |
| Coleoptera                               | Coleoptera  | indifferent |
| Collembola                               | Collembola  | indifferent |
| Coreidae                                 | Hemiptera   | pest        |
| Crambidae                                | Lepidoptera | indifferent |
| <i>Crossocerus exiguus</i>               | Hymenoptera | indifferent |
| Curculionidae                            | Coleoptera  | pest        |
| Delphacidae                              | Hemiptera   | pest        |
| <i>Demetrias atricapillus</i>            | Coleoptera  | beneficial  |
| <i>Deraeocoris lutescens</i>             | Hemiptera   | beneficial  |
| <i>Deraeocoris ruber</i>                 | Hemiptera   | beneficial  |
| <i>Dicyphus</i> sp.                      | Hemiptera   | beneficial  |
| Diptera                                  | Diptera     | indifferent |
| <i>Drosophila suzukii</i> **             | Diptera     | indifferent |

|                                      |             |             |
|--------------------------------------|-------------|-------------|
| Drosophilidae                        | Diptera     | indifferent |
| Elateridae                           | Coleoptera  | pest        |
| <i>Enoplognatha</i> sp.              | Araneae     | beneficial  |
| <i>Euceraphis betulae</i>            | Hemiptera   | pest        |
| <i>Eupoedes</i> sp.                  | Diptera     | beneficial  |
| Forficulidae                         | Dermaptera  | beneficial  |
| <i>Formica rufibarbis</i>            | Hymenoptera | pest        |
| Formicidae                           | Hymenoptera | pest        |
| Gastropoda                           | Gastropoda  | pest        |
| <i>Gelis</i> sp.                     | Hymenoptera | pest        |
| Geometridae                          | Lepidoptera | pest        |
| <i>Gonocerus acuteangulatus</i>      | Hemiptera   | pest        |
| Gracillariidae                       | Lepidoptera | pest        |
| Halictidae                           | Hymenoptera | beneficial  |
| <i>Harmonia axyridis</i>             | Coleoptera  | beneficial  |
| Hemerobiidae                         | Neuroptera  | beneficial  |
| Heteroptera                          | Hemiptera   | indifferent |
| <i>Heterotoma planicornis</i>        | Hemiptera   | beneficial  |
| Ichneumonidae (parasitoid)           | Hymenoptera | beneficial  |
| Isopoda                              | Isopoda     | indifferent |
| Laelapidae                           | Acarina     | beneficial  |
| <i>Lagria hirta</i>                  | Coleoptera  | indifferent |
| <i>Lasius niger</i>                  | Hymenoptera | pest        |
| Latridiidae sp.                      | Coleoptera  | indifferent |
| Lepidoptera                          | Lepidoptera | pest        |
| <i>Liocoris tripustulatus</i>        | Hemiptera   | indifferent |
| Lygaeidae                            | Hemiptera   | indifferent |
| <i>Lygocoris pabulinus</i>           | Hemiptera   | pest        |
| <i>Malacocoris chlorizans</i>        | Hemiptera   | beneficial  |
| Microlepidoptera                     | Lepidoptera | pest        |
| <i>Micromus variegatus</i>           | Neuroptera  | beneficial  |
| Miridae                              | Hemiptera   | pest        |
| Nabidae sp.                          | Hemiptera   | beneficial  |
| Noctuidae                            | Lepidoptera | indifferent |
| <i>Notostira elongata</i>            | Hemiptera   | indifferent |
| <i>Opiliones</i> sp.                 | Araneae     | beneficial  |
| <i>Oribatida</i> sp.                 | Acarina     | indifferent |
| <i>Orius</i> sp.                     | Hemiptera   | beneficial  |
| <i>Orthops kalmii</i>                | Hemiptera   | pest        |
| <i>Otiorhynchus</i> sp.              | Coleoptera  | pest        |
| <i>Otiorhynchus tenebricosus</i>     | Coleoptera  | pest        |
| <i>Oulema melanopus</i>              | Coleoptera  | indifferent |
| <i>Oxybelus uniglumis</i>            | Hymenoptera | indifferent |
| <i>Palomena prasina</i>              | Hemiptera   | pest        |
| Panorpidae                           | Mecoptera   | beneficial  |
| Pentatomidea                         | Hemiptera   | pest        |
| <i>Phyllobius</i> sp.                | Coleoptera  | pest        |
| <i>Piezodorus lituratus</i>          | Hemiptera   | indifferent |
| <i>Pilophorus perplexus</i>          | Hemiptera   | beneficial  |
| <i>Protapion fulvipes</i>            | Coleoptera  | pest        |
| <i>Protapion</i> sp.                 | Coleoptera  | indifferent |
| Psocoptera                           | Psocoptera  | indifferent |
| Psyllidae                            | Hemiptera   | pest        |
| <i>Psylliodes</i> sp.                | Coleoptera  | pest        |
| <i>Psyllobora vigintiduopunctata</i> | Coleoptera  | beneficial  |
| <i>Psyllopsis fraxini</i>            | Hemiptera   | indifferent |
| Pterophoridae                        | Lepidoptera | indifferent |

---

|                                   |              |             |
|-----------------------------------|--------------|-------------|
| <i>Selandria serva</i>            | Hymenoptera  | indifferent |
| <i>Sitona</i> sp.                 | Coleoptera   | pest        |
| <i>Sphaerophoria scripta</i>      | Diptera      | beneficial  |
| Staphylinidae                     | Coleoptera   | beneficial  |
| <i>Stenodema laevigata</i>        | Hemiptera    | indifferent |
| <i>Stephanitis takeyai</i>        | Hemiptera    | indifferent |
| <i>Tachyporus</i> sp.             | Coleoptera   | beneficial  |
| Tenthredinidae                    | Hymenoptera  | pest        |
| <i>Theridion</i> sp.              | Araneae      | beneficial  |
| <i>Theridion varians</i>          | Araneae      | beneficial  |
| Thomisidae                        | Araneae      | beneficial  |
| Thysanoptera (Thrips)             | Thysanoptera | pest        |
| Tipulidae                         | Diptera      | pest        |
| <i>Trigonotylus caelestialium</i> | Hemiptera    | indifferent |
| Trombidiidae                      | Acarina      | beneficial  |

---

\* While well-known pests or beneficial arthropods were identified to species or family level based on morphological characteristics, other specimens (mostly considered as indifferent) were only classified into the family or an even higher taxonomic level for this study. \*\* Although *D. suzukii* is a serious pest in soft fruits, it is not considered as a pest for pome fruit.
